# Supplementary material
Source: PubMed Central journal article supplement (PMC2410071)
Supplement: pnas_0706407105_5.pdf [file pnas_0706407105_5.pdf]

CB[7] (0.57 mM) + FcCH<sub>2</sub>N(CH<sub>3</sub>)<sub>3</sub><sup>1+</sup> (4.18 mM)

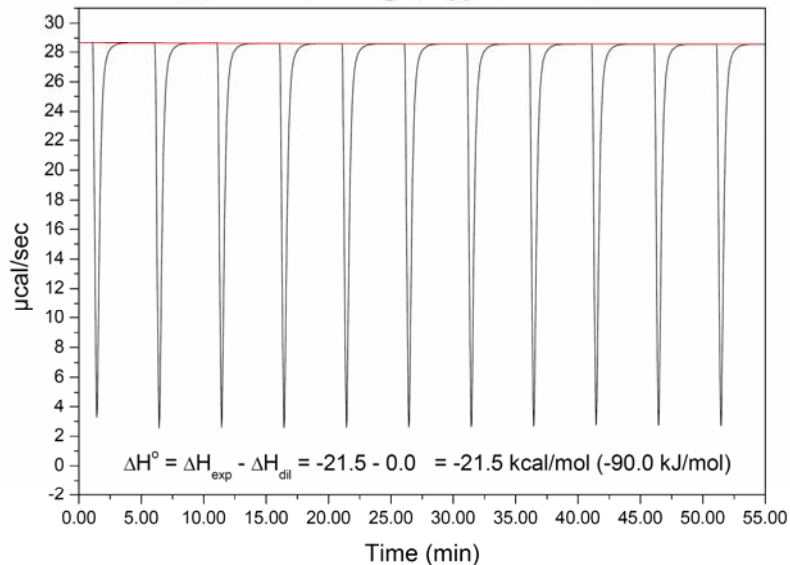

$$\Delta H^\circ = \Delta H_{\text{exp}} - \Delta H_{\text{dil}} = -21.5 - 0.0 = -21.5 \text{ kcal/mol} (-90.0 \text{ kJ/mol})$$
