# Supplementary material
Source: PubMed Central journal article supplement (PMC2410071)

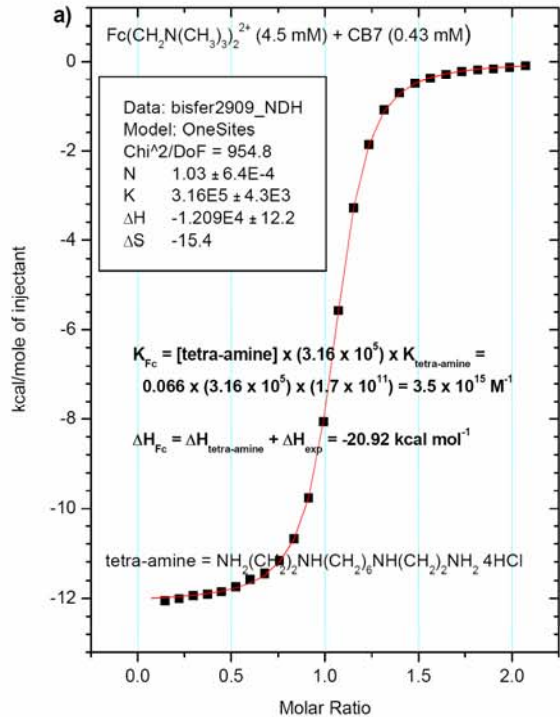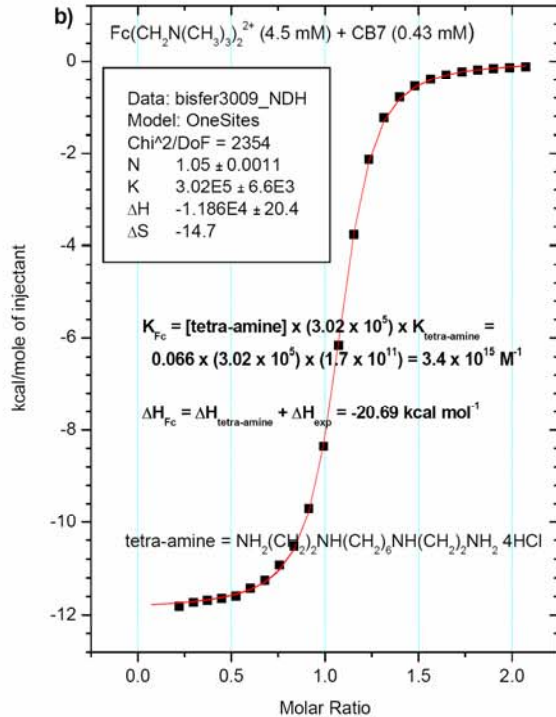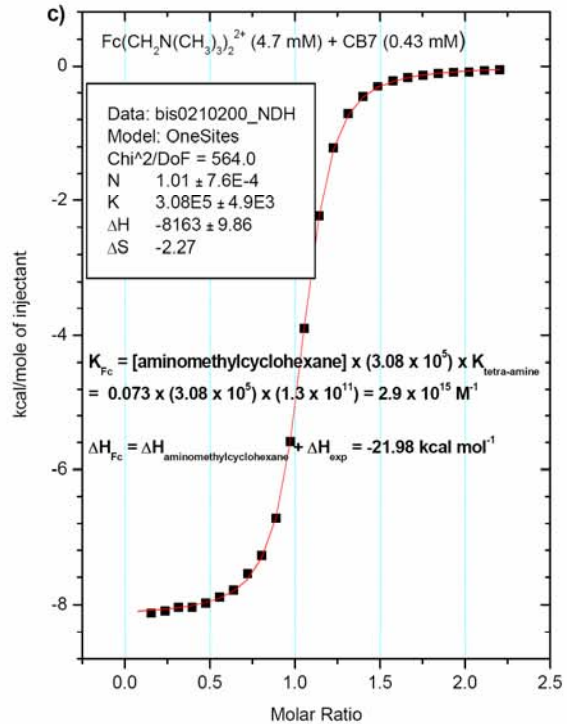

Supplement: pnas_0706407105_1.pdf [file pnas_0706407105_1.pdf]

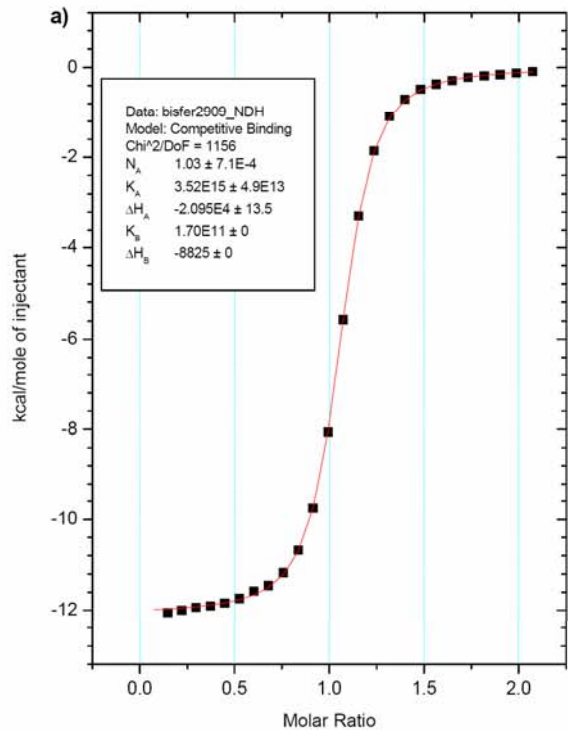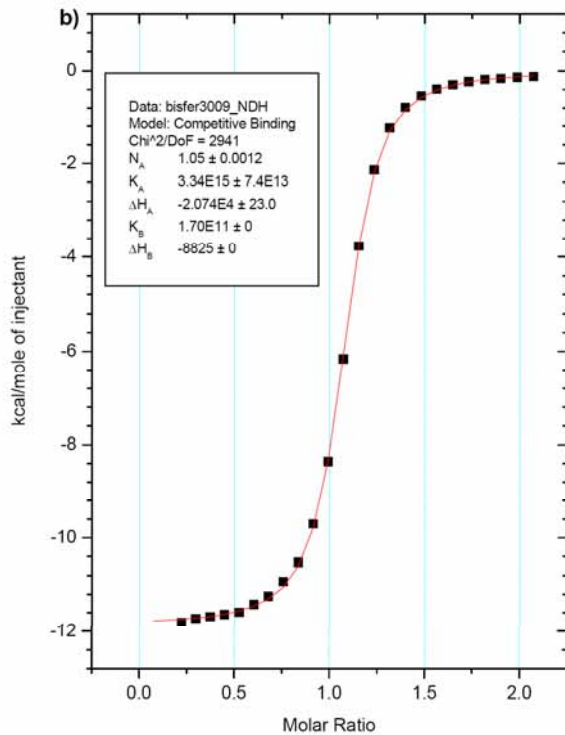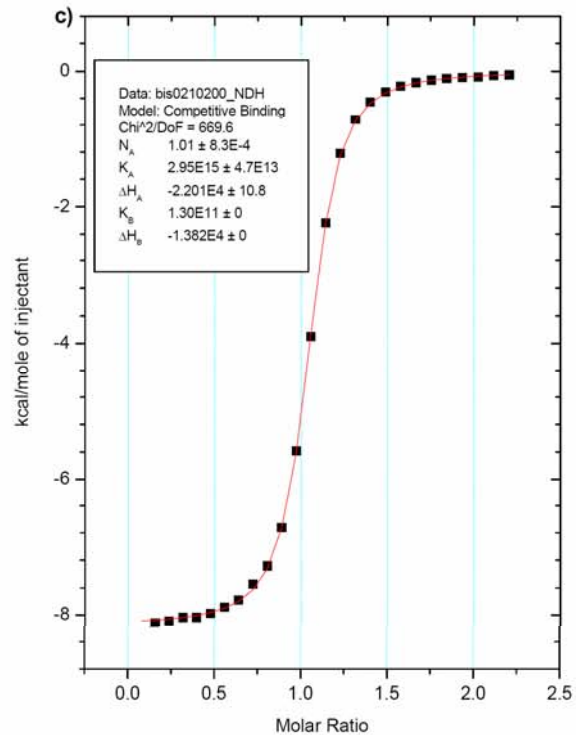

Supplement: pnas_0706407105_2.pdf [file pnas_0706407105_2.pdf]

CB[7] (0.57mM) +  $\text{Fc}(\text{CH}_2\text{N}(\text{CH}_3)_3)_2^{2+}$  (4.072mM)

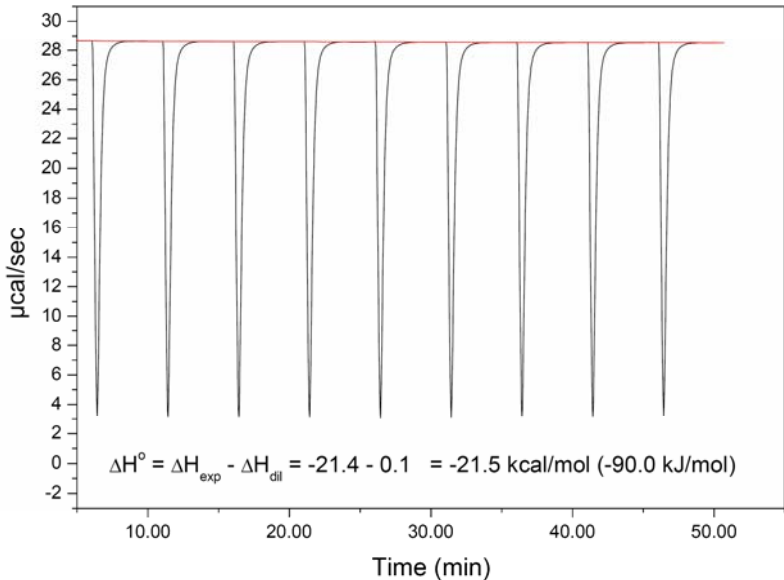

Supplement: pnas_0706407105_3.pdf [file pnas_0706407105_3.pdf]

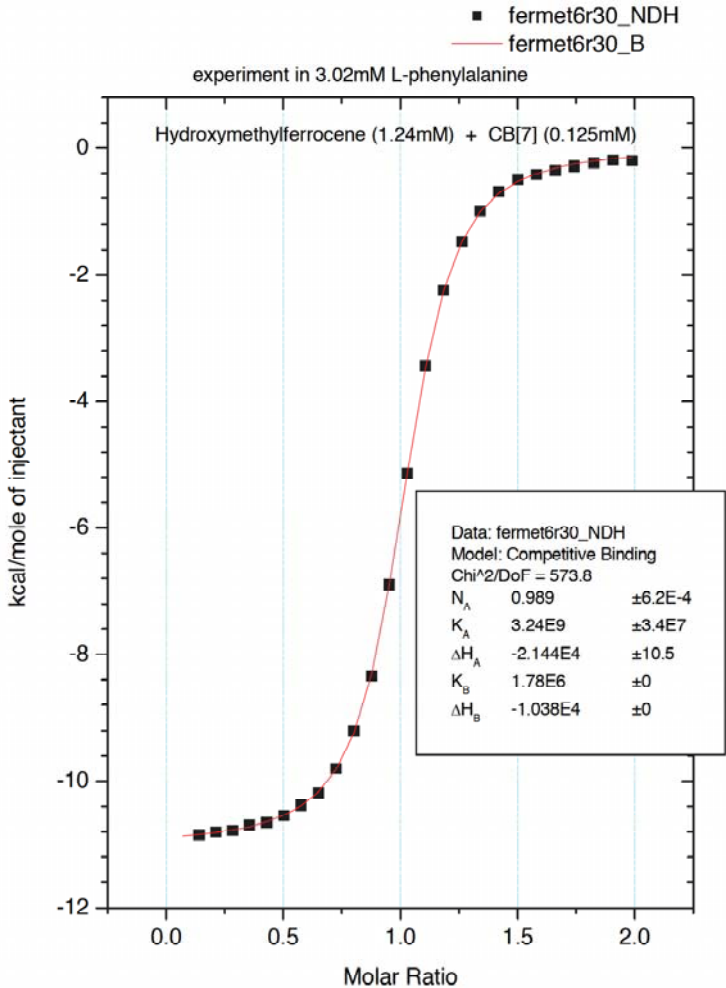

Supplement: pnas_0706407105_6.pdf [file pnas_0706407105_6.pdf]

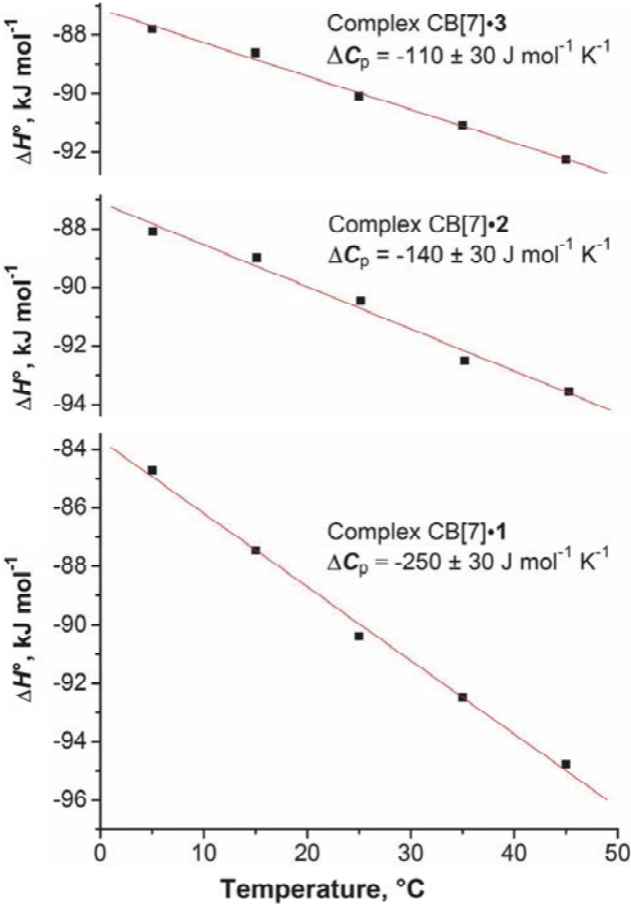

Supplement: pnas_0706407105_7.pdf [file pnas_0706407105_7.pdf]

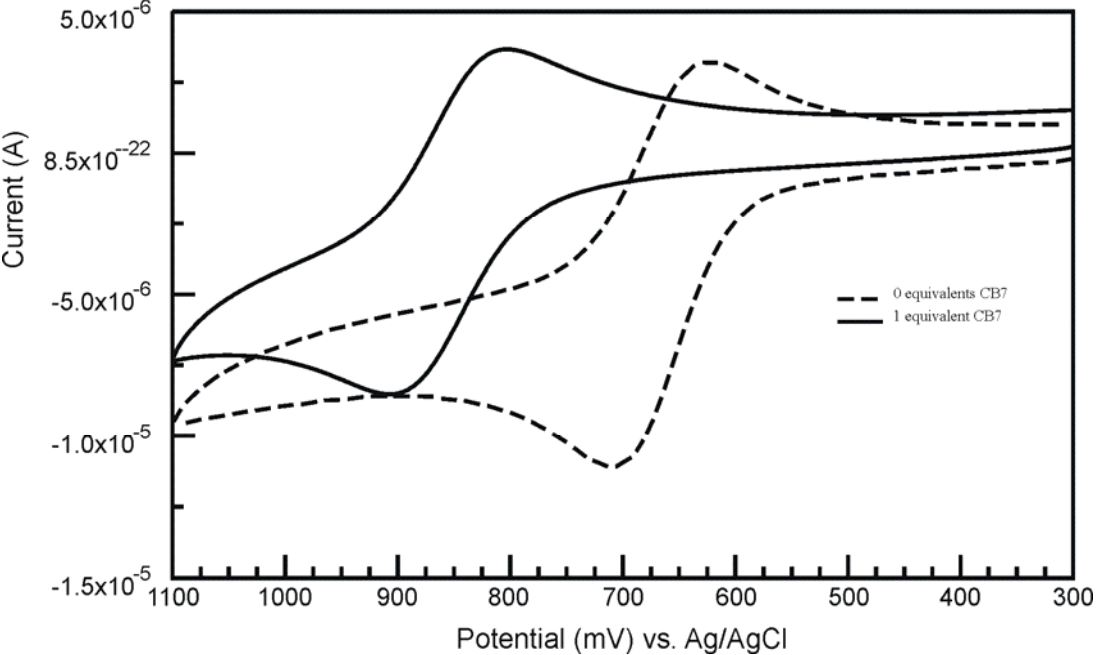

Supplement: pnas_0706407105_8.pdf [file pnas_0706407105_8.pdf]
